# Supplementary material
Source: Springer Nature journal article supplement (https://www.springermedizin.de/resource/supplementary/13058_2013_3420_MOESM12_ESM.pdf/9704130)

**A**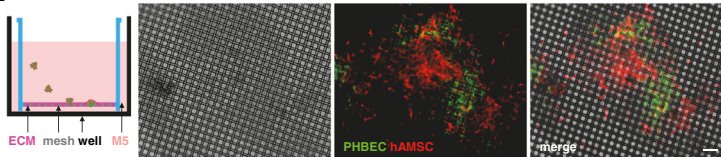**B**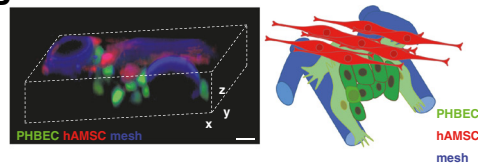**C**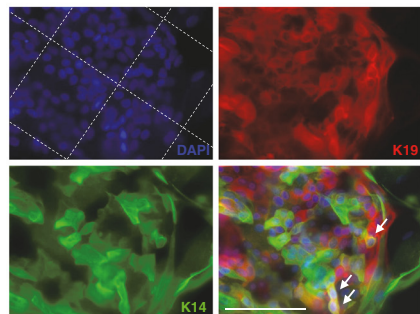**D**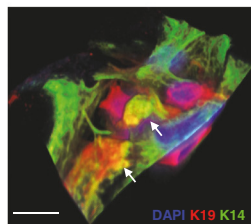**E**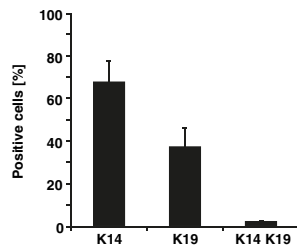**H**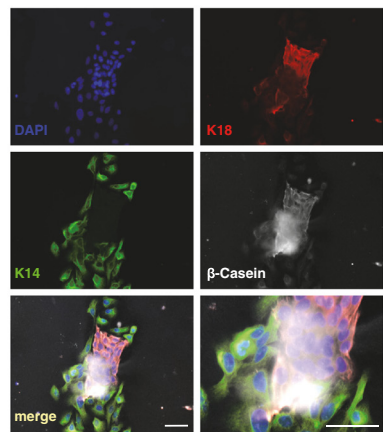**F**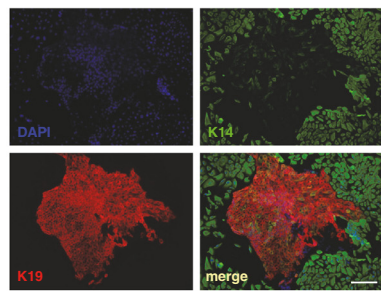**G**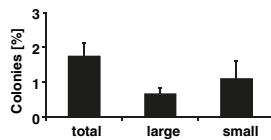

Supplement: MOESM12 [file 9704130]
